# Supplementary material for: Molecular diversity of rumen bacterial communities from tannin-rich and fiber-rich forage fed domestic Sika deer (Cervus nippon) in China
Source: PubMed Central journal article supplement (PMC3723558; doi:10.1186/1471-2180-13-151), 2013-07-08

A-1 A-2 A-3 B-1 B-2 B-3 C-1 C-2 C-3 D-1 D-2 D-3

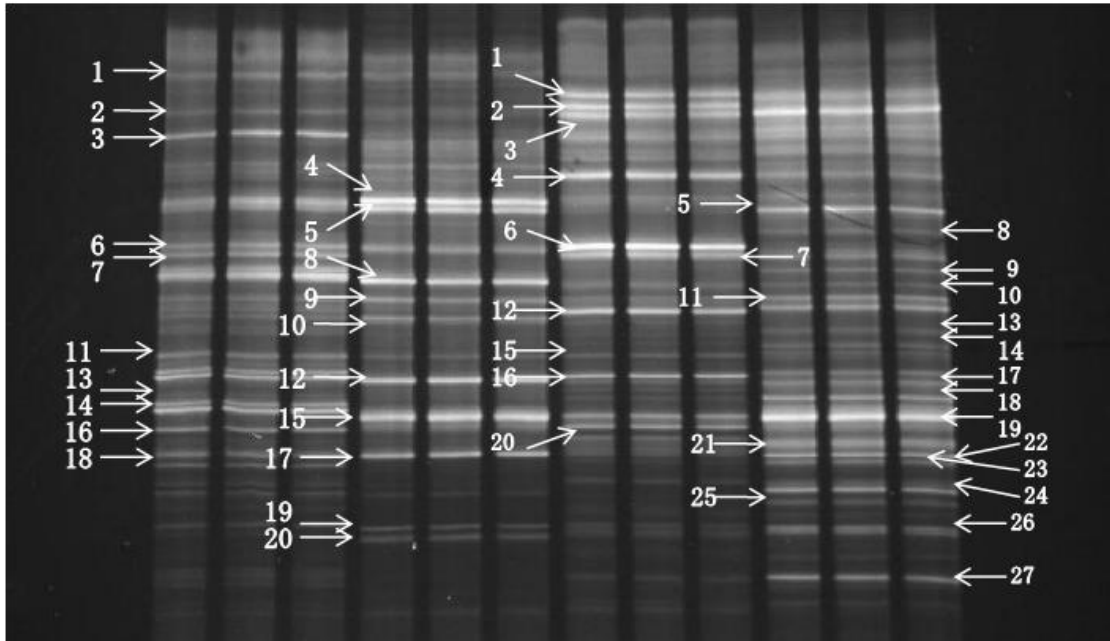

Supplement: 1471-2180-13-151-S1.pdf [file 1471-2180-13-151-S1.pdf]
